# Supplementary material
Source: PubMed Central journal article supplement (PMC3889775)
Supplement: JCM.01808-13_zjm999092877so1.pdf [file JCM.01808-13_zjm999092877so1.pdf]

1

**SUPPLEMENTAL INFORMATION**

2 Table S1. Oligonucleotides used for the in-house RT-PCR assays targeting the M, H7 or N9

3 genes.

| Assay (s)                                             | Target   | Name         | Sequence (5' → 3')                           | Comments                                                 |
|-------------------------------------------------------|----------|--------------|----------------------------------------------|----------------------------------------------------------|
| CDC M<br>(NS),<br>CDC M<br>(PE), and<br>CDC M<br>(SK) | M (FluA) | InfA Forward | GAC CRA TCC TGT CAC<br>CTC TGA C             | CDC M gene assay<br><br>(ref. 1)                         |
|                                                       |          | InfA Reverse | AGG GCA TTY TGG ACA<br>AAK CGT CTA           |                                                          |
|                                                       |          | InfA Probe   | FAM-TGC AGT CCT CGC<br>TCA CTG GGC ACG-BHQ1  |                                                          |
| CDC*M<br>(AB)                                         | M (FluA) | CDC-M-F      | GAC CRA TCC TGT CAC<br>CTC TGA C             | TAMRA quencher<br>instead of BHQ1 for<br>the FluA probe. |
|                                                       |          | CDC-M-R      | AGG GCA TTY TGG ACA<br>AAK CGT CTA           |                                                          |
|                                                       |          | CDC-M-Probe  | FAM-TGC AGT CCT CGC<br>TCA CTG GGC ACG-TAMRA |                                                          |
| CDC                                                   | M (FluA) | CDCfluAf     | CAT GGA RTG GCT AAA                          | 2005 CDC FluA                                            |

H7N9 DETECTION USING COMMERCIAL AND IN-HOUSE MOLECULAR ASSAYS

|             |          |                |                                             |                                                                                                                 |
|-------------|----------|----------------|---------------------------------------------|-----------------------------------------------------------------------------------------------------------------|
| M*(QC)      |          |                | GAC AAG ACC                                 | protocol. While the forward and reverse primers differ from the current assay, the probe sequence is identical. |
|             |          | CDCfluAr       | AGG GCA TTT TGG ACA<br>AAK CGT CTA          |                                                                                                                 |
|             |          | CDC FluA probe | FAM-TGC AGT CCT CGC<br>TCA CTG GGC ACG-BHQ1 |                                                                                                                 |
| CDC M*(QC2) | M (FluA) | CDCfluAH7N9f   | CAT GGA GTG GMT AAA<br>GAC AAG ACC          | Modified forward and reverse sequences derived from the 2005 CDC FluA protocol.                                 |
|             |          | CDCfluAH7N9r   | AGG GCR TTT TGG ACA<br>AAB CGT CTA          |                                                                                                                 |
|             |          | CDC FluA probe | FAM-TGC AGT CCT CGC<br>TCA CTG GGC ACG-BHQ1 |                                                                                                                 |
| CDC*M (MB)  | M (FluA) | FluA Forward   | GAC CRA TCC TGT CAC<br>CTC TGA C            | No sequence modifications for FluA primers or probe; however, the assay is a duplex RT-PCR with FluB.           |
|             |          | FluA Reverse   | AGG GCA TTY TGG ACA<br>AAK CGT CTA          |                                                                                                                 |
|             |          | FluA Probe     | FAM-TGC AGT CCT CGC<br>TCA CTG GGC ACG-BHQ1 |                                                                                                                 |
|             | NEP/NS1  | FluB Forward   | TCC TCA ACT CAC TCT                         |                                                                                                                 |

H7N9 DETECTION USING COMMERCIAL AND IN-HOUSE MOLECULAR ASSAYS

|                                    |              |              |                                                        |                                                                                                                                                                                                                                                                                               |
|------------------------------------|--------------|--------------|--------------------------------------------------------|-----------------------------------------------------------------------------------------------------------------------------------------------------------------------------------------------------------------------------------------------------------------------------------------------|
|                                    | (FluB)       |              | TCG AGC G                                              |                                                                                                                                                                                                                                                                                               |
|                                    |              | FluB Reverse | CGG TGC TCT TGA CCA<br>AAT TGG                         |                                                                                                                                                                                                                                                                                               |
|                                    |              | FluB Probe   | HEX-CCA ATT CGA GCA<br>GCT GAA ACT GCG GTG-<br>BHQ_1   |                                                                                                                                                                                                                                                                                               |
| CDC<br>M*(NS)<br>and CDC<br>M*(BC) | M (FluA)     | FluA F       | GAC CRA TCC TGT CAC<br>CTC TGA C                       | Quadruplex for<br>FluA, FluB, RSV,<br>and RNaseP. For<br>FluA, the M gene<br>forward primer is<br>unchanged, whereas<br>the reverse primer<br>was shortened by 1<br>nucleotide at the 5'<br>end and extended by<br>2 nucleotides at the<br>3' end. The FluA<br>probe contains the<br>same FAM |
|                                    |              | FluA R       | GGG CAT TYT GGA CAA<br>AKC GTC TAC G                   |                                                                                                                                                                                                                                                                                               |
|                                    |              | FluA pr      | FAM/ZEN- TGC AGT CCT<br>CGC TCA CTG GGC ACG-<br>IaBkFQ |                                                                                                                                                                                                                                                                                               |
|                                    | NP<br>(FluB) | FluB F       | TCC TCA ACT CAC TCT<br>TCG AGC G                       |                                                                                                                                                                                                                                                                                               |
|                                    |              | FluB R       | CGG TGC TCT TGA CCA<br>AAT TGG                         |                                                                                                                                                                                                                                                                                               |
|                                    |              | FluB pr      | MAX/ZEN-CCA ATT CGA<br>GCA GCT GAA ACT GCG             |                                                                                                                                                                                                                                                                                               |

H7N9 DETECTION USING COMMERCIAL AND IN-HOUSE MOLECULAR ASSAYS

|             |           |           |                                               |                                                                                                      |
|-------------|-----------|-----------|-----------------------------------------------|------------------------------------------------------------------------------------------------------|
|             |           |           | GTG-IaBkFQ                                    | fluorophore, but the quencher(s) differ (internally quenched by ZEN and the 3' end contains IaBkFQ). |
|             | L (RSV)   | RSV F     | GGA YTG TTT ATG AAT<br>GCC TAT GGT            |                                                                                                      |
|             |           | RSV R     | GGR TTR TTC AAT ATA<br>TGG TAG AAT CC         |                                                                                                      |
|             |           | RSV pr    | Cy5-TCC ACA ACT TGY<br>TCC ATT TCT GC-IaBkRQ  |                                                                                                      |
|             | RNaseP    | RNaseP F  | AGA TTT GGA CCT GCG<br>AGC G                  |                                                                                                      |
|             |           | RNaseP R  | GAG CGG CTG TCT CAA<br>CAA GT                 |                                                                                                      |
|             |           | RNaseP pr | NED-TCT GAC CTG AAG<br>GCT C-MGBNFQ           |                                                                                                      |
| WHO H7 (SK) | H7 (FluA) | CNIC-H7F  | AGA AAT GAA ATG GCT<br>CCT GTC AA             | WHO H7 protocol (collaboration with CNIC, ref. 2)                                                    |
|             |           | CNIC-H7R  | GGT TTT TTC TTG TAT TTT<br>TAT ATG ACT TAG    |                                                                                                      |
|             |           | CNIC-H7P  | FAM-AGA TAA TGC TGC<br>ATT CCC GCA GAT G-BHQ1 |                                                                                                      |

H7N9 DETECTION USING COMMERCIAL AND IN-HOUSE MOLECULAR ASSAYS

|                                          |              |              |                                                                               |                                                                                                                                                                                                                            |
|------------------------------------------|--------------|--------------|-------------------------------------------------------------------------------|----------------------------------------------------------------------------------------------------------------------------------------------------------------------------------------------------------------------------|
| CDC*H7<br>(MB),<br>and<br>CDC*H7<br>(SK) | H7<br>(FluA) | H7N9 Forward | GAA TGC ACA GGG AGA<br>GGG AAC TG                                             | Based on H7N9 sequences available from GISAID, the CDC H7 primers and probe were modified. The probe is labeled at the 5'-end with FAM, is quenched internally at a modified "T" residue with BHQ1, and has a 3' C3 Spacer |
|                                          |              | H7N9 Reverse | CAT TGC TAC CAA GAG<br>TTC AGC AT                                             |                                                                                                                                                                                                                            |
|                                          |              | H7N9 Probe   | FAM-AAA GCA CTC<br>AA"T"(BHQ1) CGG CAA<br>TTG ATC AAA TAA CAG<br>GA-Spacer C3 |                                                                                                                                                                                                                            |
| WHO N9<br>(SK)                           |              | CNIC-N9F     | TAG CAA TGA CAC ACA<br>CTA GTC AAT                                            | WHO N9 protocol (collaboration with CNIC, ref. 2)                                                                                                                                                                          |
|                                          |              | CNIC-N9R     | ATT ACC TGG ATA AGG<br>GTC ATT ACA CT                                         |                                                                                                                                                                                                                            |
|                                          |              | CNIC-N9P     | FAM-AGA CAA TCC CCG<br>ACC GAA TGA CCC-BHQ1                                   |                                                                                                                                                                                                                            |

1 Abbreviations: 6-carboxyfluorescein (FAM); Alberta (AB); Blackhole Quencher 1 (BHQ1);  
2 British Columbia (BC); Centers for Disease Control and Prevention (CDC); Chinese National  
3 Influenza Center (CNIC); Global Initiative on Sharing All Influenza Data (GISAID);  
4 hemagglutinin 7 (H7); influenza A (FluA); influenza B (FluB); Iowa Black FQ quencher  
5 (IaBkFQ); Manitoba (MB); matrix (M); minor groove binder non-fluorescent quencher  
6 (MGBNFQ); neuraminidase 9 (N9); Nova Scotia (NS); nuclear export protein (NEP); non-  
7 structural protein 1 (NS1); not applicable (N/A); Ontario (ON); Prince Edward Island (PE);  
8 Québec (QC); respiratory syncytial virus (RSV); ribonuclease P (RNaseP); Saskatchewan (SK);  
9 World Health Organization (WHO).

10

## 11 **Supplemental References**

- 12 1. **WHO:** CDC protocol for real-time RT-PCR for swine influenza A H1N1.  
13 [http://www.who.int/csr/resources/publications/swineflu/CDCrealtimeRTPCRprotocol\\_20](http://www.who.int/csr/resources/publications/swineflu/CDCrealtimeRTPCRprotocol_20090428.pdf)  
14 [090428.pdf](http://www.who.int/csr/resources/publications/swineflu/CDCrealtimeRTPCRprotocol_20090428.pdf). (last accessed July 25, 2013).  
15 2. [http://www.who.int/influenza/gisrs\\_laboratory/cnic\\_realtime\\_rt\\_pcr\\_protocol\\_a\\_h7n9.pd](http://www.who.int/influenza/gisrs_laboratory/cnic_realtime_rt_pcr_protocol_a_h7n9.pdf)  
16 [f](http://www.who.int/influenza/gisrs_laboratory/cnic_realtime_rt_pcr_protocol_a_h7n9.pdf). (last accessed July 25, 2013).

17

18
